# Convergent use of phosphatidic acid for Hepatitis C virus and SARS-CoV-2 replication organelle formation

Keisuke Tabata<sup>1†\*</sup>, Vibhu Prasad<sup>1\*</sup>, David Paul<sup>1‡</sup>, Ji-Young Lee<sup>1</sup>, Minh-Tu Pham<sup>1</sup>, Woan-Ing Twu<sup>1</sup>, Christopher J. Neufeldt<sup>1</sup>, Mirko Cortese<sup>1</sup>, Berati Cerikan<sup>1</sup>, Cong Si Tran<sup>1</sup>, Christian Luchtenborg<sup>2</sup>, Philip V'kovski<sup>3,4</sup>, Katrin Hörmann<sup>5</sup>, André C. Müller<sup>5</sup>, Carolin Zitzmann<sup>6!!</sup>, Uta Haselmann<sup>1</sup>, Jürgen Beneke<sup>7</sup>, Lars Kaderali<sup>6</sup>, Holger Erfle<sup>7</sup>, Volker Thiel<sup>3,4</sup>, Volker Lohmann<sup>1</sup>, Giulio Superti-Furga<sup>5,8</sup>, Britta Brügger<sup>2</sup>, and Ralf Bartenschlager<sup>1,9,10, &</sup>

## Affiliations:

<sup>1</sup>Department of Infectious Diseases, Molecular Virology, Heidelberg University, Heidelberg, Germany

<sup>2</sup>Biochemistry Center Heidelberg, Heidelberg University, Heidelberg, Germany

<sup>3</sup>Institute of Virology and Immunology IVI, Bern, Switzerland.

<sup>4</sup>Department of Infectious Diseases and Pathobiology, Vetsuisse Faculty, University of Bern, Bern, Switzerland.

<sup>5</sup>CeMM Research Center for Molecular Medicine of the Austrian Academy of Sciences, Vienna, Austria.

<sup>6</sup>Institute of Bioinformatics and Center for Functional Genomics of Microbes, University Medicine Greifswald, Greifswald, Germany.

<sup>7</sup>BioQuant, Heidelberg University, Heidelberg, Germany.

<sup>8</sup>Center for Physiology and Pharmacology, Medical University of Vienna, Vienna, Austria.

<sup>9</sup>Division Virus-Associated Carcinogenesis, German Cancer Research Center, Heidelberg, Germany

<sup>10</sup>German Center for Infection Research, Heidelberg Partner Site, Heidelberg, Germany

†Keisuke Tabata: Department of Genetics, Graduate School of Medicine, Osaka University, Osaka, Japan; Laboratory of Intracellular Membrane Dynamics, Graduate School of Frontier Biosciences, Osaka University

‡David Paul: MRC Laboratory of Molecular Biology, Francis Crick Avenue, Cambridge CB2 0QH, UK

!!Carolin Zitzmann: Los Alamos National Laboratory, Theoretical Biology and Biophysics Los Alamos, NM, USA

\* These authors contributed equally to this work

& Correspondence:

Ralf Bartenschlager: [ralf.bartenschlager@med.uni-heidelberg.de](mailto:ralf.bartenschlager@med.uni-heidelberg.de) ; Phone: +49-6221-564225; Fax: +49-6221-564570

## 42 **Abstract**

43 Double membrane vesicles (DMVs) are used as replication organelles by phylogenetically  
44 and biologically distant pathogenic RNA viruses such as hepatitis C virus (HCV) and severe  
45 acute respiratory syndrome coronavirus-2 (SARS-CoV-2). Viral DMVs are morphologically  
46 analogous to DMVs formed during autophagy, and although the proteins required for DMV  
47 formation are extensively studied, the lipids driving their biogenesis are largely unknown.  
48 Here we show that production of the lipid phosphatidic acid (PA) by acylglycerolphosphate  
49 acyltransferase (AGPAT) 1 and 2 in the ER is important for DMV biogenesis in viral  
50 replication and autophagy. Using DMVs in HCV-replicating cells as model, we found that  
51 AGPATs are recruited to and critically contribute to HCV replication and DMV formation.  
52 AGPAT1/2 double knockout also impaired SARS-CoV-2 replication and the formation of  
53 autophagosome-like structures. By using correlative light and electron microscopy, we  
54 observed the relocalization of AGPAT proteins to HCV and SARS-CoV-2 induced DMVs. In  
55 addition, an intracellular PA sensor accumulated at viral DMV formation sites, consistent  
56 with elevated levels of PA in fractions of purified DMVs analyzed by lipidomics. Apart from  
57 AGPATs, PA is generated by alternative pathways via phosphatidylcholine (PC) and  
58 diacylglycerol (DAG). Pharmacological inhibition of these synthesis pathways also impaired  
59 HCV and SARS-CoV-2 replication as well as formation of autophagosome-like DMVs.  
60 These data identify PA as an important lipid used for replication organelle formation by HCV  
61 and SARS-CoV-2, two phylogenetically disparate viruses causing very different diseases, i.e.  
62 chronic liver disease and COVID-19, respectively. In addition, our data argue that host-  
63 targeting therapy aiming at PA synthesis pathways might be suitable to attenuate replication  
64 of these viruses.

65

## 66 **One Sentence Summary**

67 Phosphatidic acid is important for the formation of double membrane vesicles, serving as  
68 replication organelles of hepatitis C virus and SARS-CoV-2, and offering a possible host-  
69 targeting strategy to treat SARS-CoV-2 infection.

70

71

## 72 **Main Text**

73 Chronic hepatitis C and COVID-19 are major medical problems. Both diseases are  
74 caused by viral infections inflicting a large number of people and having led to millions of  
75 deaths <sup>1,2</sup>. Chronic hepatitis C is caused by persistent infection with the hepatitis C virus  
76 (HCV), while COVID-19 is due to acute infection with the severe acute respiratory syndrome  
77 coronavirus-2 (SARS-CoV-2). Both viruses are biologically very distinct e.g. by having a  
78 very narrow tropism and a predominantly persistent course of infection in the case of HCV,  
79 contrasting the rather broad tropism and acute self-limiting course of infection in the case of  
80 SARS-CoV-2. This biological distinction is reflected by their phylogenetic distance with  
81 HCV belonging to the *Flaviviridae* and SARS-CoV-2 being a member of the *Coronaviridae*  
82 virus family <sup>3</sup>. In spite of these differences, both viruses possess a single strand RNA genome  
83 of positive polarity that is replicated in membranous vesicles in the cytoplasm of infected  
84 cells <sup>4,5</sup>. These vesicles are induced by viral proteins, in concert with cellular factors, and  
85 composed of two membrane bilayers, thus corresponding to double-membrane vesicles  
86 (DMVs). These DMVs accumulate in infected cells and can be regarded as viral replication  
87 organelle. Viral DMVs have morphological similarity to autophagosomes <sup>6,7</sup>, but while  
88 autophagy-induced DMVs serve to engulf cellular content and damaged organelles for  
89 subsequent degradation, viral DMVs create a conducive and protective environment for  
90 productive viral RNA replication. In the case of HCV and SARS-CoV-2, DMVs are derived

91 from the ER <sup>8, 9, 10</sup> and can be induced by the nonstructural proteins (NS)3, 4A, 4B, 5A and  
92 5B in the case of HCV <sup>7</sup> and the viral proteins nsp3-4 in the case of MERS-CoV and SARS-  
93 CoV <sup>11, 12</sup>, alongside with co-opted host cell proteins and lipids. Here, we set-out to search for  
94 common host cell factors exploited by the phylogenetically distant HCV and SARS-CoV-2 to  
95 build up their cytoplasmic replication organelle.

96 Using HCV as a model to study DMV biogenesis, we purified DMVs under native  
97 conditions and determined their molecular composition by proteomic profiling (Fig. 1A and  
98 B). To this end we used human hepatoma cells (Huh7) containing a self-replicating HCV  
99 replicon RNA (designated sg4B<sup>HA</sup>31R; <sup>13</sup>) in which NS4B was HA-tagged (fig. S1A). This  
100 RNA replicates autonomously and induces an extensive array of DMVs that can be isolated  
101 by HA-affinity purification <sup>13</sup>. Mass spectrometry-based proteomics analysis identified a total  
102 of 1487 proteins significantly enriched in the NS4B-HA sample relative to the untagged  
103 technical negative control (using SAINT average *P*-values >0.95) (data S1). Label free  
104 quantitation (LFQ) revealed a major overlap of proteins (1542) between the NS4B-HA  
105 complex and HCV-naïve ER membranes purified in parallel from Huh7 cells stably  
106 expressing HA-tagged Calnexin (CNX-HA) (Fig. 1B and fig. S1B). Of note, 309 proteins  
107 were significantly enriched in the NS4B-HA sample relative to the ER control with an over-  
108 representation of proteins involved in RNA metabolism, intracellular vesicle organization and  
109 transport as well as endomembrane organization (fig. S2). Given our interest in identifying  
110 proteins of relevance for DMV formation, we selected 139 candidates with a bias for proteins  
111 involved in vesicle transport and biogenesis as well as lipid metabolism. These candidates  
112 were validated with respect to their role in HCV replication by using RNA interference-based  
113 screening (Fig. 1C and data S2). In this way we could validate 38 hits as HCV dependency  
114 factors. Amongst identified hits were acylglycerolphosphate acyltransferase (AGPAT) 1 and  
115 2, two enzymes that catalyze the *de novo* formation of phosphatidic acid (PA), a precursor to  
116 di- and triacylglycerols as well as all glycerophospholipids <sup>14, 15</sup>. In addition, PA is involved  
117 in signaling and protein recruitment to membranes and, owing to its small and highly charged  
118 head group, promotes membrane curvature <sup>16, 17, 18</sup>. Since these properties might be involved  
119 in DMV formation, we focused our subsequent analysis on AGPATs.

120 AGPATs play crucial roles in lipid homeostasis, because enzyme-inactivating mutations  
121 in AGPAT2 are linked to congenital generalized lipodystrophy and defects in PA metabolism  
122 as well as autophagy are associated with neurological disorders and chronic obstructive  
123 pulmonary disease <sup>18, 19</sup>. Moreover, severe lipodystrophy as well as extreme insulin resistance  
124 and hepatic steatosis have been observed in AGPAT2<sup>-/-</sup> mice <sup>14</sup>. To date, 11 AGPATs have  
125 been identified in mammalian cells. AGPAT1 to 5 preferentially utilize lysophosphatidic acid  
126 (LPA) as an acyl donor while AGPAT6 to 11 preferentially utilize alternative  
127 lysophospholipid substrates or have a preference for glycerol-3-phosphate. Thus, only  
128 AGPAT1 to 5 function as true LPA acyltransferases <sup>14</sup>. To establish which AGPAT family  
129 members are found in NS4B-associated membranes, FLAG-tagged versions of each of the 5  
130 AGPATs were transiently expressed in cells containing the HCV replicon sg4B<sup>HA</sup>31R (fig.  
131 S3A). Pull-down of NS4B-HA revealed association with AGPAT1 and 2, and to a lesser  
132 extent with AGPAT3, but not with AGPAT4 and 5. Additionally, endogenous AGPAT1 and  
133 2 were detected in NS4B-HA containing membranes isolated from replicon-containing cells  
134 (Fig. 1D), whereas AGPAT 3 was not enriched. Moreover, in HCV infected cells AGPAT1  
135 and 2 were recruited to NS4B-containing sites that most likely correspond to sites of DMV  
136 accumulation <sup>13</sup> (Fig. 1E).

137 To validate the role of AGPAT1 and 2 in HCV replication, we created knock-out cells  
138 using CRISPR/Cas9. Although we observed reduced cell growth of stable double knock-out  
139 (DKO) cells 8 days after transduction of guide RNAs, single KO cell pools showed no  
140 decrease in cell growth and could be used for transient knock-out of the other AGPAT gene  
141 without impacting cell viability for up to 8 days after transduction (fig. S3B). Using this  
142 approach, we observed that AGPAT1/2 DKO impaired lipid droplet formation (fig. S3, C to

143 E) as shown previously<sup>20,21</sup>, confirming disruption of AGPAT1/2 function. To monitor the  
144 impact of single KO and AGPAT1/2 DKO on HCV replication, cells were infected with an  
145 HCV reporter virus and viral replication was determined by using luciferase assay. While  
146 single KO suppressed HCV replication by ~50-70%, a reduction by ~90% was observed in  
147 DKO cells (Fig. 1F). Even stronger replication suppression was observed with a subgenomic  
148 replicon (fig. S4A), confirming that AGPAT depletion affected viral RNA replication and not  
149 virus entry or assembly. Of note, replication was completely restored by stable expression of  
150 AGPAT1 and 2 in DKO cells, which was not the case with either or both enzymatically  
151 inactive mutants (Fig. 1G). In contrast, replication of Dengue virus (DENV) and Zika virus  
152 (ZIKV), also belonging to the *Flaviviridae* family, but inducing morphologically different  
153 membrane alterations, i.e. ER membrane invaginations<sup>4</sup>, was not affected as determined by  
154 plaque assay or with a reporter virus (Fig. 1H and fig. S4B, respectively). These results  
155 suggest that enzymatically active AGPAT1 and 2 are required for HCV replication with both  
156 AGPATs having partially redundant functions.

157 Next, we determined the impact of AGPAT KO on HCV-induced DMV formation. Since  
158 AGPAT1/2 DKO reduces RNA replication, we employed a replication-independent system in  
159 which DMV production is induced by the sole expression of an HCV NS3-5B polyprotein  
160 fragment that undergoes self-cleavage to produce functional NS3, 4A, 4B, 5A and 5B<sup>8,22</sup>  
161 (Fig. 2A). To determine the replicase subcellular location by fluorescence microscopy, NS5A  
162 was fluorescently tagged with EGFP. This tagging has no effect on replicase functionality<sup>8,22</sup>.  
163 While expression of this polyprotein induced a high number of DMVs in control cells, DMV  
164 abundance was dramatically reduced in AGPAT1/2 DKO cells (Fig. 2, A and B), although  
165 amounts of viral proteins were comparable in control and DKO cell pools (Fig. 2C).  
166 Moreover, DMVs had a smaller diameter in AGPAT2 KO cells (fig. S4C). These results  
167 argue for a pivotal role of AGPATs in HCV DMV biogenesis.

168 Given that AGPAT1 and 2 are important for DMV formation and their enzymatic  
169 activity is required for HCV replication, we next focused on their reaction product, i.e. the  
170 lipid PA. To quantify the amount of PA associated with HCV-induced DMVs and compare it  
171 to ER membranes, we determined the lipidome of highly purified DMVs isolated from cells  
172 containing the sg4B<sup>HA</sup>31R replicon (Fig. 2D). Consistent with earlier results, these  
173 membranes contained elevated amounts of cholesterol and sphingolipids, which served as  
174 positive controls, relative to ER membranes purified in parallel<sup>13,23</sup>. Of note, PA abundance  
175 in DMVs also was increased in comparison to ER membranes, whereas the level of diacyl  
176 phosphatidylcholine (aPC) and several other lipids was not affected (Fig. 2D; for further  
177 lipids see data S3).

178 To confirm these findings in single cells, we used two alternative methods to detect PA  
179 by fluorescence microscopy. First, we generated a recombinant protein composed of GST  
180 that was fused to the PA binding domain (PABD) derived from yeast Spo20p (fig. S5A and  
181 B). As a specificity control we employed the analogous sensor protein containing a mutation  
182 in the PABD that abolishes PA binding, and GST alone<sup>24</sup>. These proteins were introduced  
183 via transient permeabilization into Huh7 derived cells (fig. S5C). In cells treated with phorbol  
184 12-myristate 13-acetate (PMA), a potent activator of phospholipase D-mediated PA  
185 production, as expected the intact sensor predominantly stained the plasma membrane, which  
186 was not the case with the PA non-binding mutant or GST alone, confirming specificity of the  
187 signal (fig. S5D). Moreover, also in cells that were not treated with PMA, the PA sensor  
188 predominantly stained the plasma membrane (fig. S5D, right panel). Using this assay, we  
189 monitored intracellular PA distribution in HCV replicon-containing cells and observed PA  
190 colocalization with NS4B (fig. S5E). As second assay for intracellular PA detection, we  
191 created a GFP-tagged sensor fused to the PABD of Raf1, a serine-threonine kinase recruited  
192 to cellular membranes via its interaction with Ras and PA<sup>25</sup>. While in control Huh7 cells this  
193 PA sensor displayed a diffuse pattern (fig. S6A), upon co-expression of the HCV NS3-5B  
194 polyprotein the sensor accumulated in NS5A-positive puncta (Fig. 2E). Of note, a control PA

195 sensor containing mutations in the PABD of Raf1 (mutant 4E) <sup>26</sup> displayed only a diffuse  
196 pattern in NS3-5B expressing cells (Fig. 2E), supporting specificity of the signal and PA  
197 recruitment to HCV replication sites.

198 Since these data suggest an important role of AGPAT1 and 2-dependent PA  
199 enrichment on HCV-induced DMVs, we hypothesized that other pathways contributing to PA  
200 generation in cells might also play a role in HCV replication. Apart from AGPATs, one other  
201 route for PA synthesis is through hydrolysis of phosphatidylcholine (PC) by phospholipase  
202 D1 (PLD1) and D2 (PLD2) enzymes (Fig. 2F, top panel) <sup>17,27</sup>. To test the role of PLD1/2  
203 enzymes in HCV replication, we employed a pharmacological approach using 3 different  
204 PLD1/2 inhibitors. Treatment with PLD2 inhibitor ML298 caused replication inhibition at a  
205 concentration that did not significantly reduce cell viability (~25  $\mu$ M; Fig. 2F, bottom panel),  
206 whereas for the other drugs the reduction in HCV replication correlated with cytotoxicity (not  
207 shown). In summary, these results suggest that PA generated via AGPAT1/2, and possibly by  
208 alternative PA synthesis pathway, contributes to HCV replication by supporting the formation  
209 of DMVs, which is the site of viral RNA amplification.

210 Virus-induced DMVs are morphologically analogous to autophagosomes generated  
211 during autophagy <sup>7</sup>; therefore, we tested if PA would be recruited to and is required for  
212 autophagy-induced DMVs. To this end, we monitored the localization of the GFP tagged PA  
213 sensor with markers for DMVs induced during nonselective and selective autophagy. To  
214 monitor DMV formation induced during nonselective autophagy, cells were incubated in  
215 starvation medium with or without bafilomycin A1 (BafA1), an inhibitor of the vacuolar-type  
216 H<sup>+</sup>-ATPase inducing the accumulation of LC3-positive puncta, which are indicative of  
217 autophagosomes. For selective autophagy events, we focused on the induction of DMVs  
218 during mitophagy induced by treatment of the cells with valinomycin (Val) <sup>28,29</sup>. As shown in  
219 Fig. 2G (top row), the PA sensor GFP-PABD-Raf1 was rather uniformly distributed  
220 throughout the cell in non-induced cells. However, induction of nonselective autophagy by  
221 serum starvation led to a significant increase in the number of LC3 puncta with GFP-PABD-  
222 Raf1 relocating to these puncta (Fig. 2G). Similarly, induction of mitophagy by Val  
223 treatment caused an abundant association of mCherry-Parkin puncta with GFP-PABD-Raf1  
224 (Fig. 2G, lower panel), whereas in control cells not treated with Val, no such association was  
225 found (fig. S6B). Next, we investigated the functional role of PA generation during  
226 nonselective and selective autophagy. Consistent with the relocalization of PA to LC3 puncta  
227 during nonselective autophagy, PA inhibitors targeting PLD1, PLD2 and AGPATs, applied  
228 as short-term treatments and at non-toxic concentrations, significantly reduced the  
229 accumulation of LC3 puncta (fig. S7). These findings are consistent with a recent study  
230 suggesting that PA generated on the ATG16L1-positive autophagosome precursor membrane  
231 contributes to autophagosome formation <sup>30</sup>. Of note, a third pathway for PA production via  
232 phosphorylation of diacylglycerol (DAG) by diacylglycerol kinase (DAGK) <sup>27</sup>, did not  
233 contribute to PA accumulation or increase in LC3 puncta during nonselective autophagy (fig.  
234 S7).

235 Having found that AGPAT1 and 2, and their reaction product PA, are involved in DMV  
236 formation induced upon HCV infection and in, morphologically similar, DMVs generated  
237 during autophagy, we hypothesized that AGPATs and PA might also be involved in the  
238 biogenesis of replication organelles of other unrelated RNA viruses, e.g., coronaviruses,  
239 which also utilize DMVs as viral replication sites <sup>9,10</sup>. Hence, we investigated the role of  
240 AGPATs in the DMV biogenesis of SARS-CoV-2, the causative agent of the ongoing  
241 COVID-19 pandemic. In the first set of experiments, we studied the recruitment of AGPATs  
242 to SARS-CoV-2 induced DMVs. In the case of MERS-CoV and SARS-CoV, formation of  
243 DMVs with structural resemblance to those observed in infected cells can be induced by the  
244 sole expression of viral nonstructural protein (nsp)3-4, which is an ~270 kilodalton large  
245 polyprotein fragment undergoing self-cleavage <sup>12</sup>. Building on these results we first  
246 determined whether the same applies to SARS-CoV-2. Huh7-derived cells stably expressing

247 T7 RNA polymerase were transiently transfected with a T7 promoter driven SARS-CoV-2  
248 HA-nsp3-4-V5 expression construct or the empty vector (fig S8A). Using  
249 immunofluorescence with an HA-specific antibody in many cells we observed clusters of HA-  
250 nsp3 (fig. S8B). Western blotting confirmed efficient self-cleavage between nsp3 and nsp4  
251 (fig. S8C). To identify membrane alterations in HA-nsp3-4-V5 expressing cells, we  
252 employed CLEM. Cells were transfected with the analogous expression construct encoding in  
253 addition the NeonGreen gene to allow visualization of transfected cells by fluorescence  
254 microscopy (fig. S8D). NeonGreen positive cells were recorded and examined by  
255 transmission electron microscopy, revealing abundant clusters of DMVs (fig S8D).  
256 Comparison of DMVs induced by nsp3-4 expression and by SARS-CoV-2 infection revealed  
257 similar morphology, although expression-induced DMVs were smaller (~125 nm compared  
258 to ~300 nm, respectively) (fig S8E). These results show that the sole expression of SARS-  
259 CoV-2 nsp3-4 is sufficient to induce DMVs with structural similarity to those generated in  
260 infected cells.

261 Next, we employed this expression-based system to determine AGPAT function in  
262 SARS-CoV-2 nsp3-4 induced DMV formation. Huh7-derived cells expressing GFP-tagged  
263 AGPAT1 or 2 were transiently transfected with the SARS-CoV-2 HA-nsp3-4-V5 encoding  
264 plasmid or the empty vector and colocalization of AGPATs with HA-nsp3 was determined by  
265 immunofluorescence microscopy. While in empty vector-transfected cells AGPAT2 and 1  
266 were homogeneously distributed throughout the ER (Fig. 3A and fig. S9A, respectively), we  
267 observed a strong relocalization of AGPATs in HA-nsp3-4-V5 expressing cells with  
268 AGPATs forming puncta that colocalized with HA-nsp3 (Fig. 3, A and B; fig. S9A). Of note,  
269 the relocalization of AGPATs induced by HA-nsp3-4-V5 was not the result of the massive  
270 ER alterations occurring in SARS-CoV-2 infected cells, since the subcellular distribution of  
271 other ER resident proteins, such as protein disulfide-isomerase (PDI) and calnexin remained  
272 unaffected compared to the large puncta observed with AGPATs (Fig. 3C). Since SARS-  
273 CoV-2 replication organelles are comprised of DMVs, convoluted membranes and zippered  
274 ER <sup>31</sup>, we next investigated the membrane structures at the sites of AGPAT colocalization  
275 with HA-nsp3-4-V5. Using correlative light electron microscopy, we found that relocalized  
276 AGPAT puncta perfectly correlated with extensive networks of SARS-CoV-2 HA-nsp3-4-V5  
277 induced DMVs (Fig. 3D). Overall, the data shown here suggest that similar to HCV,  
278 AGPATs are relocalized to SARS-CoV-2 nsp3-4 induced DMVs, the likely sites of viral  
279 RNA replication <sup>32</sup>.

280 Next, we tested the effect of AGPAT1/2 depletion on SARS-CoV-2 infection and  
281 replication. To this end we used DKO Huh7-Lunet/T7 cells that were employed for the  
282 imaging analyses described so far and stably introduced the SARS-CoV-2 receptor gene  
283 *ACE2*. Viral replication was measured by using an image-based assay that quantifies the  
284 number of cells containing detectable amounts of the nucleocapsid (N) protein (fig. S9B).  
285 Using this approach, we observed significant reduction of SARS-CoV-2 positive cells in both  
286 single and double AGPAT knockout cells (Fig. 3E). Consistently, RT-qPCR revealed similar  
287 reduction of viral replication in single and double KO cells (Fig. 3E, lower right panel). To  
288 determine if reduced SARS-CoV-2 replication in AGPAT1/2 KO cells might correlate with  
289 altered DMV formation, we transiently expressed SARS-CoV-2 HA-nsp3-4-V5 in control,  
290 single and double KO cells. The absence of AGPAT 1/2 did not significantly affect the  
291 abundance of cleaved viral proteins HA-nsp3 and nsp4-V5 (fig. S8C). EM analysis of control  
292 cells revealed HA-nsp3-4-V5 induced membrane alterations, consistent with an earlier report  
293 for MERS-CoV and SARS-CoV <sup>12</sup> (Fig. 3, F and G). This included zippered ER and DMVs  
294 with an average diameter of 145 nm. In contrast to HCV, the number of nsp3-4 induced  
295 DMVs did not decrease in AGPAT single and double KO cells (Fig. 3G, left two panels).  
296 However, in both cell pools we observed marked accumulations of multi-membrane vesicles  
297 (MMVs), indicating the formation of aberrant membrane structures (Fig. 3, F and G).

298 To test whether similar to AGPAT1/2 relocalization to nsp3-4 induced DMVs, PA is also  
299 enriched at those sites we used the GFP-tagged PA sensor derived from Raf1. In Huh7-  
300 derived cells expressing SARS-CoV-2 HA-nsp3-4-V5, the functional version of the sensor  
301 (GFP-PABD-Raf1-WT) strongly colocalized with HA-nsp3 in distinct puncta, whereas no  
302 such puncta were found with the mutant PABD-Raf1, confirming specificity of PA sensor  
303 recruitment to HA-nsp3-containing sites (Fig. 4, A and B).

304 Although in comparison to HCV, AGPAT1/2 DKO had lower impact on SARS-CoV-2  
305 replication (compare Fig. 1F with Fig. 3E), and caused a morphologically distinct phenotype  
306 of nsp3-4 induced DMVs (Fig. 2A and 3F, respectively), AGPATs, and most likely PA, still  
307 accumulated at sites of SARS-CoV-2 DMV clusters (Fig. 4, A and B). This indicates that PA  
308 synthesis pathways other than via AGPAT1/2, might contribute to SARS-CoV-2 replication  
309 and DMV formation. By means of pharmacological inhibitors of enzymes that convert LPA,  
310 PC and DAG to PA (fig. S7A), we measured the dose-dependent effect of these drugs on  
311 SARS-CoV-2 replication. All inhibitors reduced SARS-CoV-2 replication in Calu-3 cells and  
312 in A549 cells stably expressing ACE2, two commonly used cell models for this virus, at non-  
313 cytotoxic concentrations, although in the case of the general AGPAT inhibitor CI976  
314 selectivity was rather low (Fig. 4C and fig. S10A, respectively). Of note, combining the  
315 inhibitors at concentrations close to or below their IC50 values caused much stronger  
316 reduction of virus replication with no or minimal effect on cell viability, indicating that  
317 SARS-CoV-2 can utilize PA produced by alternative PA synthesis pathways (fig. S10, A and  
318 B). We then measured the effect of these drugs on PA accumulation at HA-nsp3 containing  
319 puncta in HA-nsp3-4-V5 expressing cells and found that all inhibitors reduced PA levels at  
320 these sites (Fig. 4D). This reduction was not the result of altered HA-nsp3-4-V5 expression  
321 level or self-cleavage, which were unaffected in inhibitor-treated cells (fig. S10C). Next, we  
322 determined if reduced PA levels caused by these inhibitors also affect SARS-CoV-2 nsp3-4  
323 induced DMV formation. In cells treated with AGPAT, PLD1, and DAGK inhibitors DMV  
324 diameters were significantly reduced (Fig. 4, E and F). Moreover, PLD2 inhibition promoted  
325 the formation of MMVs and larger DMVs, similar to what we found in AGPAT single and  
326 double KO cells (Fig. 3F). Taken together, our data suggest that PA enrichment is important  
327 for proper SARS-CoV-2 DMV formation and viral replication.

328 Here, we show that PA produced by AGPAT1 and 2 is important for the replication of  
329 evolutionary distant positive-strand RNA viruses, HCV and SARS-CoV-2 that amplify their  
330 genome in association with DMVs. The remarkable dependence on a common host lipid for  
331 the DMV biogenesis in these two viruses that differ profoundly in the diseases they cause and  
332 in their biological properties, indicates a striking similarity in the biogenesis of these  
333 organelles. Conversely, for viruses replicating their RNA genome in ER-derived membrane  
334 invaginations such as the flaviviruses DENV and ZIKV, this lipid pathway appears to be  
335 dispensable<sup>4, 33</sup>. Of note, PA production through AGPAT1 and 2 is also involved in the  
336 formation of autophagosome-like DMVs, arguing for some similarity between cellular and  
337 viral DMV formation and lipid composition. Additionally, alternative routes of PA  
338 biosynthesis contribute to HCV and SARS-CoV-2 replication and DMV generation.

339 At least three possibilities can be envisioned how PA promotes DMV formation in  
340 viral replication and in the context of autophagy. First, the presence of lipids with cone or  
341 inverted cone shape in membranes contributes to membrane bending by generating negative  
342 or positive membrane curvature, respectively<sup>16</sup>. While LPA has a large polar head group to  
343 fatty acid tail ratio, giving rise to an inverse-cone shape and resulting in positive membrane  
344 curvature, the additional fatty acid tail present in PA inverts the head-to-tail ratio. Hence PA  
345 displays an overall cone shape, which contributes to negative membrane curvature. Thus, the  
346 LPA - PA conversion by AGPATs might contribute to DMV formation by facilitating  
347 membrane curvature. Second, PA is directly or indirectly implicated in membrane fission<sup>34</sup>.  
348 This might be achieved by recruitment of effector proteins by PA, either through downstream  
349 signaling events, or directly by serving as docking site for PA-binding proteins that have

350 amphipathic or hydrophobic surfaces. In this regard, our NS4B-proteome showed the  
351 enrichment of three known PA-interacting proteins, namely, Vitronectin, splicing factor-1,  
352 and ubiquitin carboxy-terminal hydrolase L1, in the viral DMV fraction (data S1)<sup>35</sup>. More  
353 than 50 different proteins have been reported to interact with PA, including protein kinases,  
354 phosphatases, nucleotide-binding proteins and regulators, however, a comprehensive list  
355 remains elusive, and their possible role in the formation of DMVs during autophagy or viral  
356 RNA replication, if any, remains to be determined<sup>18</sup>. Third, an additional role of PA for the  
357 functionality of viral replication organelles and perhaps also autophagosomes might be in  
358 serving as an exchange lipid in a counter-transporter chain. In the case of HCV, we and  
359 others identified accumulation of PI4P at DMVs<sup>7</sup> and similar findings have been made for  
360 membranous structures involved in the early steps of autophagy<sup>36</sup>. For HCV, it is thought  
361 that PI4P recruits lipid transporters such as OSBP that deliver cholesterol into DMV  
362 membranes in exchange for PI4P. A similar mechanism might apply for other lipids or the  
363 PI4P precursor PI, with PA serving as a possible exchange factor against these other lipids or  
364 PI, respectively.

365 The similar dependency of DMV-type replication organelles on PA, as reported here  
366 for HCV and SARS-CoV-2, might offer an attractive starting point for broad-spectrum  
367 antivirals targeting a diverse range of positive-strand RNA viruses replicating in such  
368 structures. In line with this assumption, an inhibitor of cytosolic phospholipase A<sub>2</sub> $\alpha$  has been  
369 reported to suppress replication and DMV formation of the 229E human coronavirus and to  
370 exert antiviral activity also against the alphavirus Semliki forest virus<sup>37</sup>. In addition, several  
371 human diseases have been linked to defects in PA metabolism and selective autophagy,  
372 including neurological disorders and chronic obstructive pulmonary disease<sup>18,19</sup>. Although  
373 the precise role of PA in these diseases remains to be determined, the critical role of PA for  
374 HCV and SARS-CoV-2 infection reported here might offer new approaches for therapeutic  
375 intervention.

376

## 377 **References and Notes:**

- 378 1. W H O Situation Reports. Coronavirus disease (COVID-19) Weekly Epidemiological  
379 Update and Weekly Operational Update.) (2021).
- 380 2. Spearman CW, Dusheiko GM, Hellard M, Sonderup M. Hepatitis C. *Lancet* **394**,  
382 1451-1466 (2019).
- 383 3. Wolf YI, *et al.* Origins and Evolution of the Global RNA Virome. *mBio* **9**, (2018).
- 385 4. Neufeldt CJ, Cortese M, Acosta EG, Bartenschlager R. Rewiring cellular networks by  
386 members of the Flaviviridae family. *Nat Rev Microbiol* **16**, 125-142 (2018).
- 388 5. V'Kovski P, Kratzel A, Steiner S, Stalder H, Thiel V. Coronavirus biology and  
389 replication: implications for SARS-CoV-2. *Nat Rev Microbiol* **19**, 155-170 (2021).
- 391 6. Lamb CA, Yoshimori T, Tooze SA. The autophagosome: origins unknown,  
392 biogenesis complex. *Nat Rev Mol Cell Biol* **14**, 759-774 (2013).
- 394 7. Paul D, Bartenschlager R. Flaviviridae Replication Organelles: Oh, What a Tangled  
395 Web We Weave. *Annu Rev Virol* **2**, 289-310 (2015).
- 396



- 397  
398 8. Romero-Brey I, *et al.* Three-dimensional architecture and biogenesis of membrane  
399 structures associated with hepatitis C virus replication. *PLoS Pathog* **8**, e1003056  
400 (2012).
- 401  
402 9. Cortese M, *et al.* Integrative Imaging Reveals SARS-CoV-2-Induced Reshaping of  
403 Subcellular Morphologies. *Cell Host Microbe* **28**, 853-866 e855 (2020).
- 404  
405 10. Snijder EJ, *et al.* A unifying structural and functional model of the coronavirus  
406 replication organelle: Tracking down RNA synthesis. *PLoS biology* **18**, e3000715  
407 (2020).
- 408  
409 11. Wolff G, Melia CE, Snijder EJ, Barcena M. Double-Membrane Vesicles as Platforms  
410 for Viral Replication. *Trends Microbiol* **28**, 1022-1033 (2020).
- 411  
412 12. Oudshoorn D, *et al.* Expression and Cleavage of Middle East Respiratory Syndrome  
413 Coronavirus nsp3-4 Polyprotein Induce the Formation of Double-Membrane Vesicles  
414 That Mimic Those Associated with Coronaviral RNA Replication. *mBio* **8**, (2017).
- 415  
416 13. Paul D, Hoppe S, Saher G, Krijnse-Locker J, Bartenschlager R. Morphological and  
417 biochemical characterization of the membranous hepatitis C virus replication  
418 compartment. *J Virol* **87**, 10612-10627 (2013).
- 419  
420 14. Yamashita A, *et al.* Glycerophosphate/Acylglycerophosphate acyltransferases.  
421 *Biology (Basel)* **3**, 801-830 (2014).
- 422  
423 15. Takeuchi K, Reue K. Biochemistry, physiology, and genetics of GPAT, AGPAT, and  
424 lipin enzymes in triglyceride synthesis. *Am J Physiol Endocrinol Metab* **296**, E1195-  
425 1209 (2009).
- 426  
427 16. Kooijman EE, Chupin V, de Kruijff B, Burger KN. Modulation of membrane  
428 curvature by phosphatidic acid and lysophosphatidic acid. *Traffic* **4**, 162-174 (2003).
- 429  
430 17. Zegarłinska J, Piascik M, Sikorski AF, Czogalla A. Phosphatidic acid - a simple  
431 phospholipid with multiple faces. *Acta Biochim Pol* **65**, 163-171 (2018).
- 432  
433 18. Tanguy E, Wang Q, Moine H, Vitale N. Phosphatidic Acid: From Pleiotropic  
434 Functions to Neuronal Pathology. *Front Cell Neurosci* **13**, 2 (2019).
- 435  
436 19. Mizumura K, Choi AM, Ryter SW. Emerging role of selective autophagy in human  
437 diseases. *Front Pharmacol* **5**, 244 (2014).
- 438

- 439 20. Fernandez-Galilea M, Tapia P, Cautivo K, Morselli E, Cortes VA. AGPAT2  
440 deficiency impairs adipogenic differentiation in primary cultured preadipocytes in a  
441 non-autophagy or apoptosis dependent mechanism. *Biochem Biophys Res Commun*  
442 **467**, 39-45 (2015).
- 443
- 444 21. Cautivo KM, *et al.* AGPAT2 is essential for postnatal development and maintenance  
445 of white and brown adipose tissue. *Mol Metab* **5**, 491-505 (2016).
- 446
- 447 22. Lee JY, *et al.* Spatiotemporal Coupling of the Hepatitis C Virus Replication Cycle by  
448 Creating a Lipid Droplet- Proximal Membranous Replication Compartment. *Cell Rep*  
449 **27**, 3602-3617 e3605 (2019).
- 450
- 451 23. Khan I, *et al.* Modulation of hepatitis C virus genome replication by  
452 glycosphingolipids and four-phosphate adaptor protein 2. *J Virol* **88**, 12276-12295  
453 (2014).
- 454
- 455 24. Zhang F, *et al.* Temporal production of the signaling lipid phosphatidic acid by  
456 phospholipase D2 determines the output of extracellular signal-regulated kinase  
457 signaling in cancer cells. *Mol Cell Biol* **34**, 84-95 (2014).
- 458
- 459 25. Rizzo MA, Shome K, Watkins SC, Romero G. The recruitment of Raf-1 to  
460 membranes is mediated by direct interaction with phosphatidic acid and is  
461 independent of association with Ras. *J Biol Chem* **275**, 23911-23918 (2000).
- 462
- 463 26. Prakash P, Hancock JF, Gorfe AA. Three distinct regions of cRaf kinase domain  
464 interact with membrane. *Sci Rep* **9**, 2057 (2019).
- 465
- 466 27. Sakane F, Hoshino F, Murakami C. New Era of Diacylglycerol Kinase, Phosphatidic  
467 Acid and Phosphatidic Acid-Binding Protein. *Int J Mol Sci* **21**, (2020).
- 468
- 469 28. Yamano K, *et al.* Endosomal Rab cycles regulate Parkin-mediated mitophagy. *Elife* **7**,  
470 (2018).
- 471
- 472 29. Vargas JNS, *et al.* Spatiotemporal Control of ULK1 Activation by NDP52 and TBK1  
473 during Selective Autophagy. *Mol Cell* **74**, 347-362 e346 (2019).
- 474
- 475 30. Holland P, *et al.* HS1BP3 negatively regulates autophagy by modulation of  
476 phosphatidic acid levels. *Nat Commun* **7**, 13889 (2016).
- 477
- 478 31. Knoops K, *et al.* SARS-coronavirus replication is supported by a reticulovesicular  
479 network of modified endoplasmic reticulum. *PLoS Biol* **6**, e226 (2008).

480

- 481 32. Wolff G, *et al.* A molecular pore spans the double membrane of the coronavirus  
482 replication organelle. *Science*, (2020).
- 483
- 484 33. Welsch S, *et al.* Composition and three-dimensional architecture of the dengue virus  
485 replication and assembly sites. *Cell Host Microbe* **5**, 365-375 (2009).
- 486
- 487 34. Pagliuso A, *et al.* Golgi membrane fission requires the CtBP1-S/BARS-induced  
488 activation of lysophosphatidic acid acyltransferase delta. *Nat Commun* **7**, 12148  
489 (2016).
- 490
- 491 35. Jang J-H, Lee CS, Hwang D, Ryu SH. Understanding of the roles of phospholipase D  
492 and phosphatidic acid through their binding partners. In: *Prog. Lipid Res.*) (2012).
- 493
- 494 36. Judith D, Jefferies HBJ, Boeing S, Frith D, Snijders AP, Tooze SA. ATG9A shapes  
495 the forming autophagosome through Arfaptin 2 and phosphatidylinositol 4-kinase  
496 IIIbeta. *J Cell Biol* **218**, 1634-1652 (2019).
- 497
- 498 37. Muller C, Hardt M, Schwudke D, Neuman BW, Pleschka S, Ziebuhr J. Inhibition of  
499 Cytosolic Phospholipase A2alpha Impairs an Early Step of Coronavirus Replication in  
500 Cell Culture. *J Virol* **92**, (2018).

501

502

### 503 **Acknowledgements**

504 We thank Marie Bartenschlager, Lena Werstein, Ulrike Herian, Stephanie Kallis, Iris  
505 Leibrecht and Fredy Huschmand for excellent technical assistance. We are grateful to Eliana  
506 Acosta and Heeyoung Kim for editorial assistance. We acknowledge Alessia Ruggieri for  
507 providing empty plasmid constructs. We also acknowledge the excellent support provided by  
508 the Infectious Diseases Imaging Platform (IDIP) headed by Vibor Laketa, the University of  
509 Heidelberg Electron Microscopy Core Facility (EMCF Heidelberg) headed by Stefan Hillmer  
510 and the Proteomics and Metabolomics Facility (Pro-Met-) at CeMM. We thank the European  
511 Virus Archive (EVAg) for the provision of the HP/F/2013 ZIKV strain. We also thank all  
512 members of the Molecular Virology unit for continuous stimulating discussions.

### 513 **Funding**

514 This work was supported by grants from the Deutsche Forschungsgemeinschaft (DFG,  
515 German Research Foundation) – Project Number 272983813 – TRR 179, Project Number  
516 112927078 - TRR 83 and Project Number 314905040 – TRR 209, all to R.B. and Project  
517 Number 112927078 - TRR 83, Project Number 240245660 - SFB1129, and Project Number  
518 316659730 to B.B. V.P. is supported by a European Molecular Biology Organization  
519 (EMBO) Long-Term Fellowship (ALTF 454-2020). C.J.N was supported in part by a  
520 European Molecular Biology Organization (EMBO) Long-Term Fellowship (ALTF 466-  
521 2016). L.K. and C.Z. acknowledge funding from the BMBF, grant number 031A602A  
522 (ERASysApp SysVirDrug). P.V. and V.T. were supported by the Swiss National Science  
523 foundation (SNF Project Number 310030\_173085). G. S.-F. and K. H. were supported by a  
524 European Research Council Advanced Investigator Grant (ERC AdG 695214 i-FIVE).

525

526 **Contributions**

527 Conceptualization, K.T., V.P., D.P., and R.B.; Investigation, K.T., V.P., D.P., J-Y.L., M-T.P.,  
528 W-I.T, C.J.N., M.C., B.C., C-S.T., C.L., P.V., K.H., A.C.M, C.Z., U.H., J.B., L.K., B.B.;  
529 Writing – Original Draft, K.T., V.P., and R.B.; Writing – Review & Editing, K.T.,V.P., D.P.,  
530 J.Y.L., C.J.N., A.M, A.C.M., L.K., H.E., V.T., G.S-F., B.B. and R.B.; Funding Acquisition,  
531 R.B., B.B., L.K. and G.S.-F.  
532

533 **Competing interests**

534 Authors declare no competing interests.

535

536 **Data and materials availability**

537 All data is available in the main text or the supplementary materials.

538

539 **Supplementary Materials:**

540 Materials and Methods

541 Figures S1-S10

542 Tables S1-S5

543 References (*1-30*)

544 Other Supplementary Materials (Data S1-S3)

545

546

547 **Figures**  
548

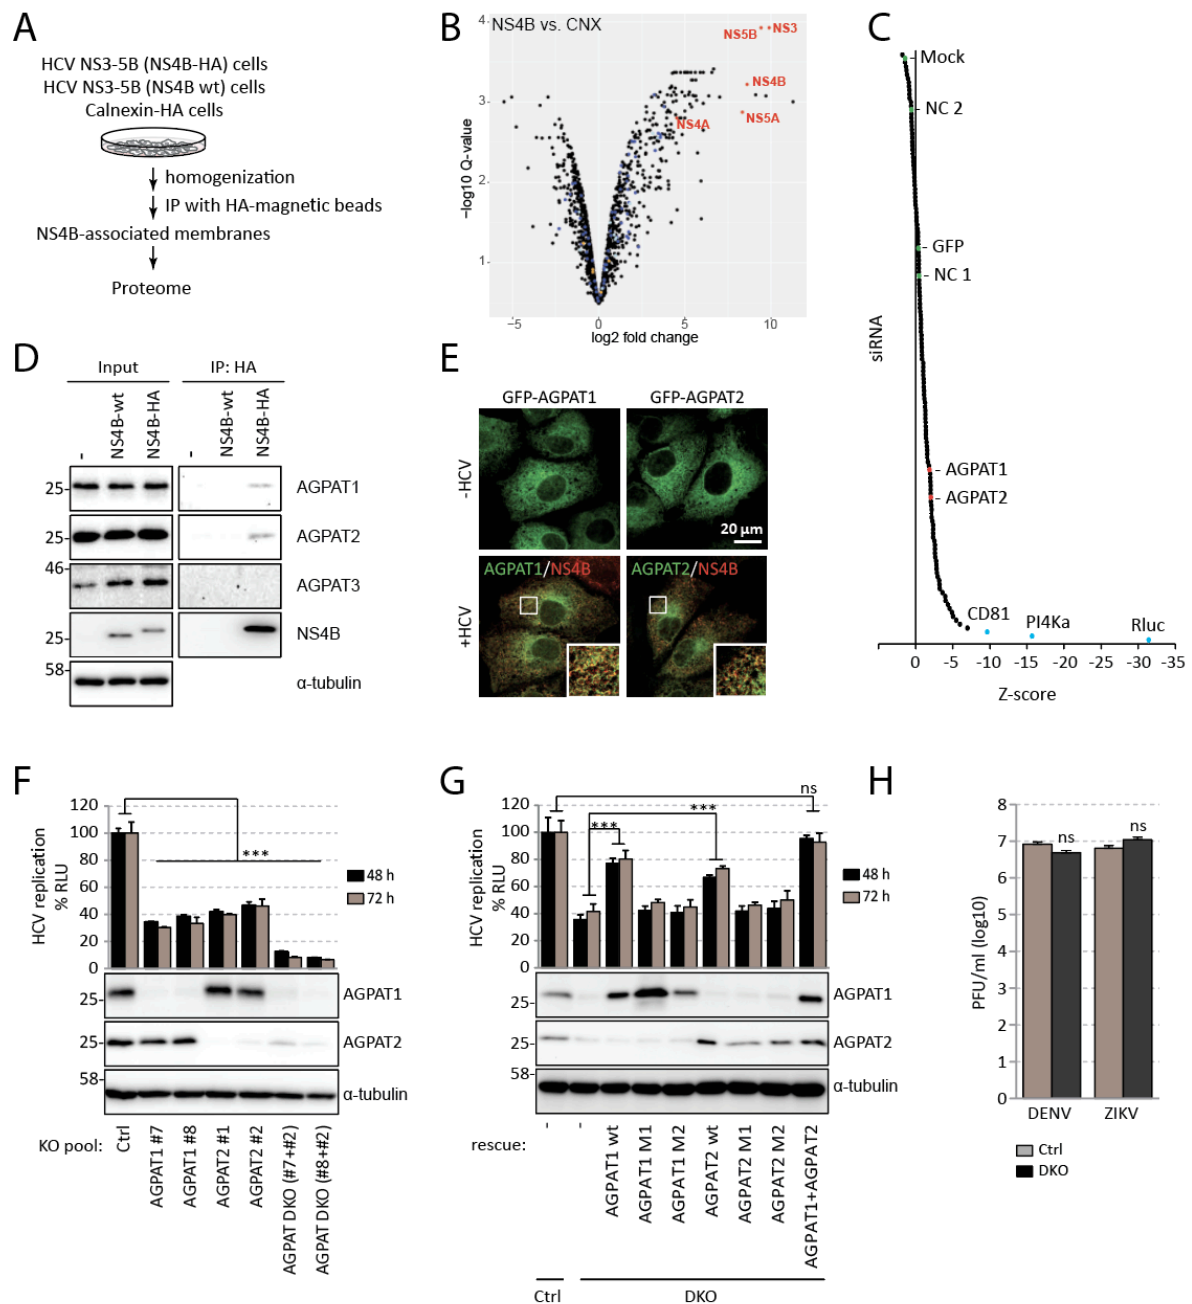

549 **Fig. 1. Proteome analysis of HCV-induced DMVs identifies AGPATs as host**  
550 **dependency factors critically contributing to viral replication.**  
551

552 (A) Experimental approach used to purify DMVs from HCV-replicating cells. (B) Volcano  
553 plot of differentially enriched interactors of NS4B and calnexin (CNX). Q-values were  
554 calculated using the limma software package and corrected for multiple hypothesis testing.  
555 Viral proteins are highlighted with red letters. A magnified view with protein hits labeled is  
556 given in fig. S1B. (C) A total of 139 genes were selected from the DMV proteome and  
557 validated by siRNA screening (3 siRNAs per gene). CD81, PI4KA and Rluc were used as  
558 positive controls; NC (negative control)1, NC2, GFP and mock infection served as negative  
559 controls. A summary of the screening is given in Data S2. (D) Endogenous AGPAT1 and 2,  
560 but not AGPAT3 are contained in NS4B-associated membranes. Membranes were purified

561 from naïve Huh7-Lunet cells (-), or Huh7-Lunet cells containing a subgenomic replicon  
562 without or with an HA-tag in NS4B (NS4B-wt and NS4B-HA, respectively). Captured  
563 proteins were analyzed by western blot, along with the input (2%).  $\alpha$ -tubulin served as  
564 loading control. (E) Colocalization of NS4B with AGPAT1 and 2. Huh7-Lunet cells stably  
565 expressing AGPAT1- or AGPAT2-GFP were transfected with *in vitro* transcripts of the HCV  
566 genome Jc1 and fixed 48 h post-transfection. (F) Effect of AGPAT KO on HCV replication.  
567 Huh7.5 cells were infected with lentiviruses encoding AGPAT-targeting-sgRNA and 5 days  
568 later, infected with an HCV reporter virus (JcR2a). After 48 h and 72 h, *renilla* luciferase  
569 activities in cell lysates, reflecting viral RNA replication, were quantified. Graph shows  
570 average and SD from 3 independent experiments. Significance was calculated by a paired t-  
571 test. \*\*\*,  $p < 0.001$ . Abundance of AGPAT proteins is shown on the bottom.  $\alpha$ -tubulin served  
572 as loading control. (G) Enzymatic activity of AGPAT is required for HCV replication. KO  
573 cells were reconstituted with sgRNA-resistant AGPAT wild-type (wt) or catalytically dead  
574 mutants (M1 and M2) by lentiviral transduction. Cells were infected with JcR2a, and *renilla*  
575 luciferase activities were quantified. Graph shows average and SD from 3 independent  
576 experiments. Significance was calculated by paired t-test. \*\*\*,  $p < 0.001$ . ns,  $p > 0.05$ . Note the  
577 complete rescue by AGPAT1 and 2 co-expression. Abundance of AGPAT proteins is shown  
578 below the graph;  $\alpha$ -tubulin served as loading control. (H) AGPAT1/2 DKO does not affect  
579 DENV or ZIKV propagation. Cells were infected with DENV-2 (strain 16681) or ZIKV  
580 (strain H/PF/2013) and 48 h later virus titer was quantified by plaque assay. Graph shows the  
581 average and SD from 3 independent experiments. Significance was analyzed by a paired t-test.  
582 ns,  $p > 0.05$ . PFU, plaque forming units.

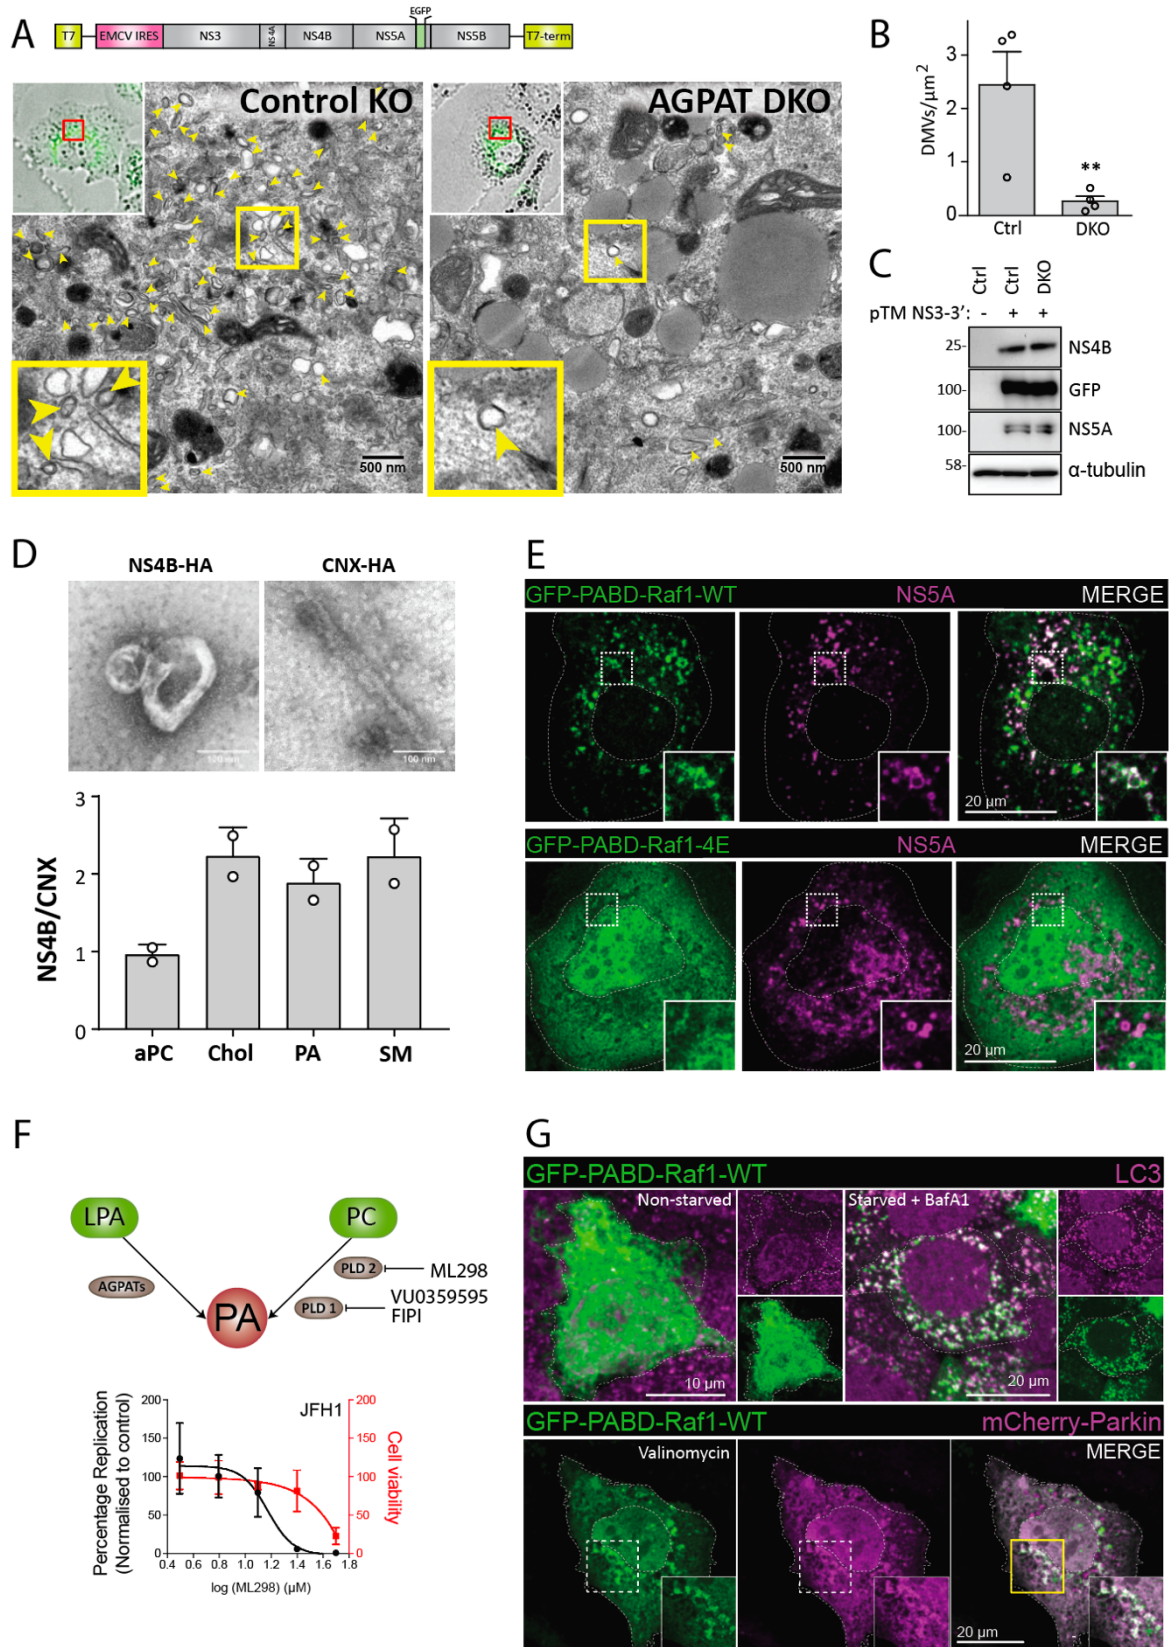

583  
584  
585  
586  
587  
588

**Fig. 2. Requirement of AGPATs for HCV-induced DMV formation and PA accumulation on HCV-induced DMVs and autophagy-related structures.** (A to C) AGPAT1/2 DKO dampens DMV formation induced by HCV. Huh7-derived cells stably expressing the T7 RNA polymerase and containing or not a double knock-out (DKO)

589 of AGPAT1 and 2 were transfected with a HCV replicase-encoding plasmid containing a  
590 GFP insertion in NS5A (construct pTM NS3-3'/5A-GFP, top panel). Transcripts are  
591 generated from the plasmid in the cytoplasm via the T7 promoter and terminator (T7-term)  
592 sequence and the HCV NS3 – 5B coding region is translated via the IRES of the  
593 encephalomyocarditis virus (EMCV). (A) After 24 h, cells were fixed and subjected to  
594 CLEM. Low resolution confocal microscopy images identifying transfected cells are shown  
595 on the top left. The area in the red box is shown in the corresponding EM image. Yellow  
596 arrow heads indicate DMVs. Insets at the bottom indicate zoomed-in regions. (B) DMVs  
597 within whole cell sections were counted and divided by cell area ( $\mu\text{m}^2$ ). Graph shows average  
598 and SD from 4 different transfected cells. Cells expressing comparable level of HCV  
599 replicase were selected for EM analysis. Significance was calculated by a paired t-test. \*\*,  
600  $p < 0.01$ . (C) Expression levels of NS4B and NS5A in transfected cells were determined by  
601 western blotting. (D) Lipidome analysis of HCV-induced DMVs. Extracts of Huh7 cells  
602 containing the subgenomic replicon sg4B<sup>HA</sup>31R (NS4B-HA) and Huh7 cells stably  
603 overexpressing HA-tagged Calnexin (CNX-HA) and control Huh7 cells were prepared as  
604 described in supplementary methods and used for HA-affinity purification under native  
605 conditions. An aliquot of the sample was analyzed by electron microscopy (top panels)  
606 whereas the majority was subjected to lipidome analysis by using mass spectrometry. Values  
607 obtained for the NS4B-HA sample were normalized to those obtained for the CNX-HA  
608 sample that was set to one. The complete list of analyzed lipids is summarized in data S3. (E)  
609 PA accumulation at NS5A containing structures. Huh7-Lunet/T7 cells were transfected with  
610 a construct analogous to the one in panel A, but containing a mCherry insertion in lieu of  
611 GFP, along with an EGFP-tagged wildtype (WT) or mutant (4E) PA sensor (construct pTM-  
612 EGFP-PABD-Raf1-WT or -4E). Twenty-four hours later, GFP-PABD and NS5A-mCherry  
613 were visualized by fluorescence microscopy. White boxes indicate regions magnified in the  
614 lower right of each panel. (F) Top panel: Alternate PA biosynthesis pathways via  
615 lysophosphatidic acid (LPA) or phosphatidylcholine (PC) catalyzed by AGPATs or PLDs,  
616 respectively. Bottom panel: Huh7-Lunet/T7 cells were electroporated with in vitro transcripts  
617 of a subgenomic HCV reporter replicon encoding the firefly luciferase. Four hours after  
618 transfection, different concentrations of PA synthesis inhibitors were added to the cells and  
619 luciferase activities were analyzed at 48 h after electroporation. Graph shows average and SD  
620 from 3 independent experiments. Cell viability determined by CellTiter-Glo luminescent  
621 assay is indicated with the red line. (G) PA recruitment to autophagy-related structures in  
622 selective and non-selective autophagy. Top panel: Huh7-derived cells expressing EGFP-  
623 PABD-Raf-1 were incubated in growth medium (top left panels) or in serum-free medium  
624 with 200 nM BafA1 (top right panels) for 3 h. Cells were fixed and stained with a LC3  
625 specific antibody. Bottom panel: For selective autophagy, mCherry-tagged Parkin was co-  
626 expressed with EGFP-PABD-Raf1, followed by incubation with 10  $\mu\text{M}$  Valinomycin to  
627 induce mitophagy. Cells were fixed after 3 h, and GFP-PABD and mCherry-Parkin were  
628 visualized by fluorescence microscopy. Images in panels E and G are maximum intensity  
629 projections.  
630  
631



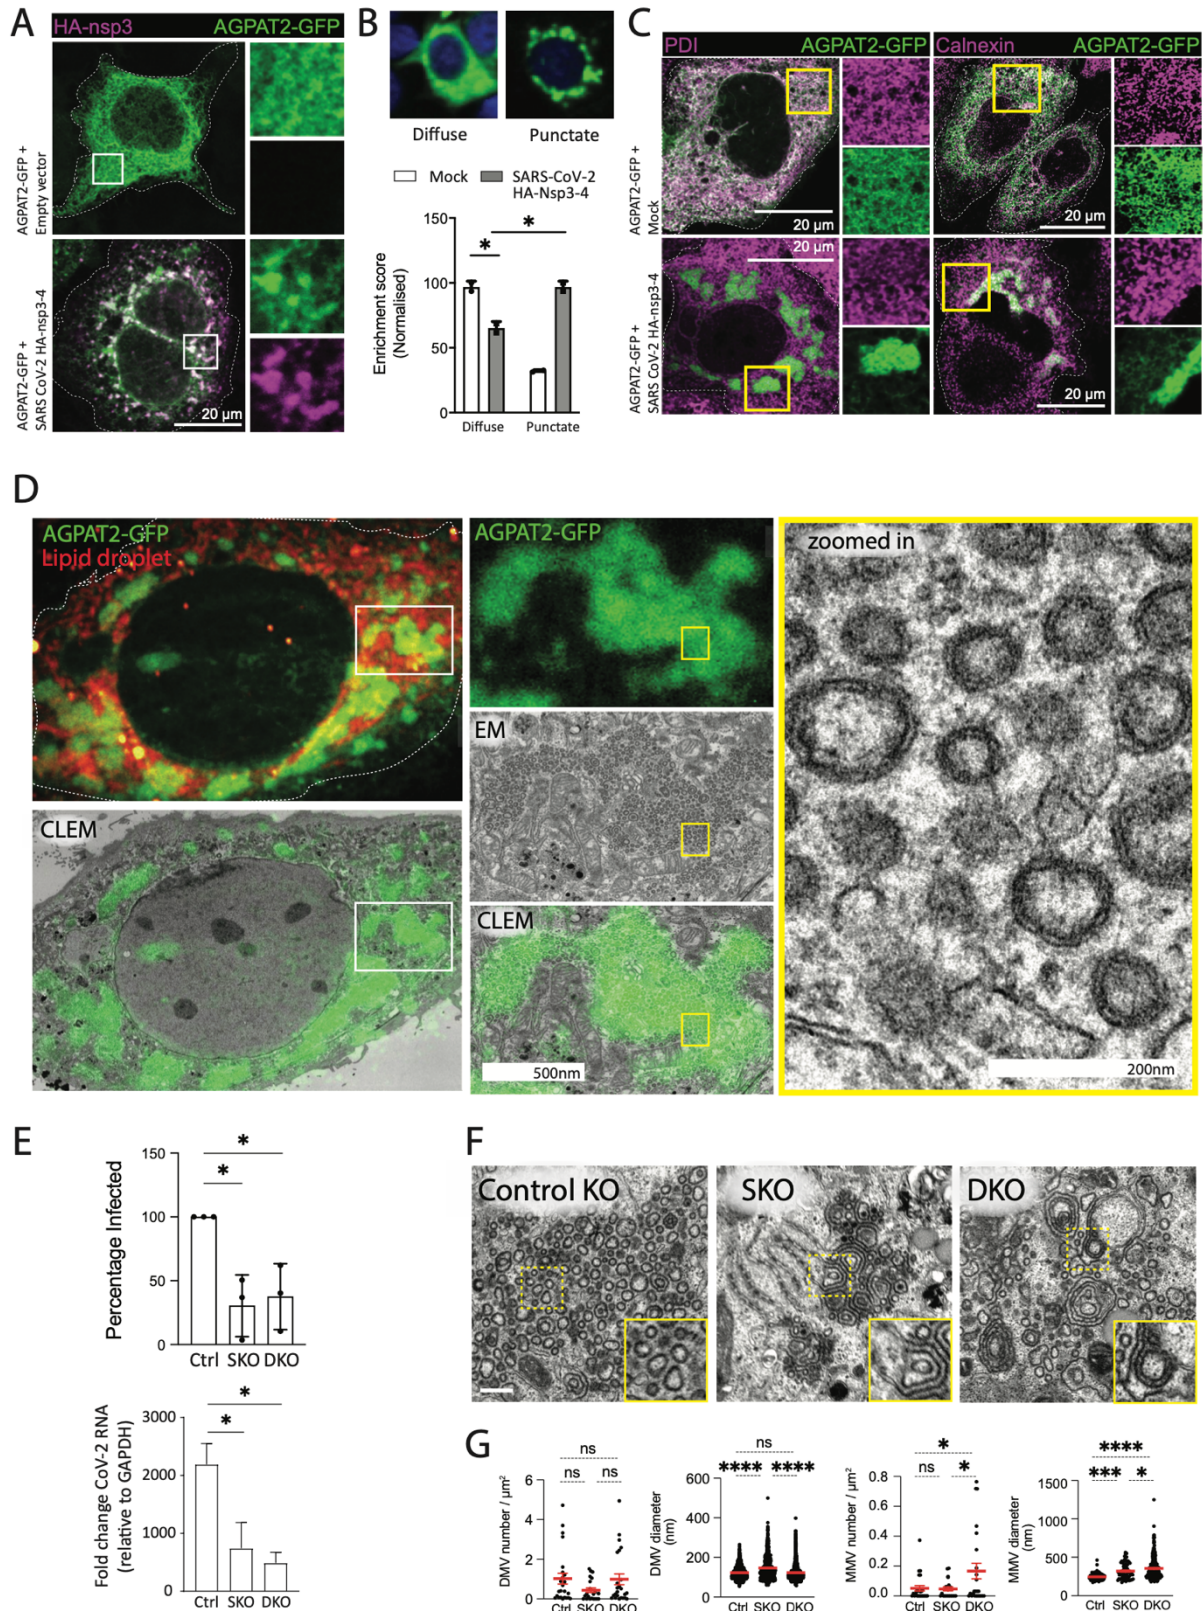

632  
633  
634

**Fig. 3. AGPATs are recruited to SARS-CoV-2 induced DMVs and contribute to viral replication**

635 (A) Change of subcellular localization of AGPATs upon expression of SARS-CoV-2 nsp3-4.  
636 Huh7-derived cells transiently expressing AGPAT2-GFP were transfected with a SARS-  
637 CoV-2 HA-nsp3-4-V5 expression construct or the empty vector. After 48h, cells were stained

638 with HA-specific antibody and examined by confocal microscopy. Maximum intensity  
639 projections are shown. Enrichment score indicates the likelihood of cells showing a punctate  
640 or diffuse staining pattern. **(B)** Clustering of AGPAT2-GFP in SARS-CoV-2 HA-nsp3-4-V5  
641 expressing cells. Huh7-Lunet/T7 cells were co-transfected with AGPAT2-GFP and SARS-  
642 CoV-2 HA-nsp3-4-V5 or the empty vector. Twenty-four hours later, cells were fixed and  
643 ~1000 cells per condition were separated into two morphotypes (diffuse or punctate) using  
644 CellProfiler Analyst based semi-supervised classifier. Significance was calculated using an  
645 unpaired t-test. \*,  $p < 0.05$ . **(C)** AGPAT clustering occurs independent of ER remodeling  
646 induced by nsp3-4. Huh7-Lunet cells expressing AGPAT2-GFP and HA-nsp3-4-V5 were  
647 stained for the ER markers protein disulfide isomerase (PDI) and calnexin and analyzed by  
648 confocal microscopy. **(D)** AGPATs are localized at SARS-CoV-2 HA-nsp3-4-V5 induced  
649 DMVs. Huh7-derived cells were transiently transfected with AGPAT2-GFP HA-nsp3-4-V5  
650 and subjected to CLEM. Light and EM images were correlated by using lipid droplets as  
651 fiducial markers. White and yellow boxes indicate areas magnified in the corresponding  
652 panels on the right. **(E)** AGPAT1/2 contribute to SARS-CoV-2 replication. Huh7-Lunet  
653 control, AGPAT2 single (SKO) and AGPAT1/2 double (DKO) cells were infected with  
654 SARS-CoV-2 (MOI=0.1). Twenty-four hours later, cells were fixed and immunostained for  
655 nucleocapsid, and the percentage of N-positive cells was determined using CellProfiler.  
656 Normalized data from three biologically independent experiments are plotted (top right  
657 panel). Total RNA was isolated from infected cells, and SARS-CoV-2 RNA levels were  
658 determined using RT-qPCR. Data were normalized to cellular GAPDH mRNA (bottom right  
659 panel). Significance was calculated using ordinary one-way ANOVA. \*,  $p < 0.05$ . **(F)** Aberrant  
660 SARS-CoV-2 DMVs in AGPAT1/2 DKO cells. Huh7-Lunet cells with single (SKO) or  
661 double knock-out (DKO) and stably expressing T7 polymerase were transfected with a  
662 plasmid encoding SARS-CoV-2 HA-nsp3-4-V5 and fluorescent neon-green. Twenty-four  
663 hours later, cells were fixed and NeonGreen positive cells were recorded and examined by  
664 EM. HA-nsp3-4-V5 induced DMVs and multi-membrane vesicles (MMVs) were quantified.  
665 Shown are the number and diameter of DMVs and MMVs in these cells as observed from at  
666 least 8 cell profiles per condition. Statistical significance was calculated using ordinary one-  
667 way ANOVA. \*\*\*\*,  $p < 0.001$ . Light microscopy images in panels A to D are maximum  
668 intensity projections.  
669  
670  
671  
672

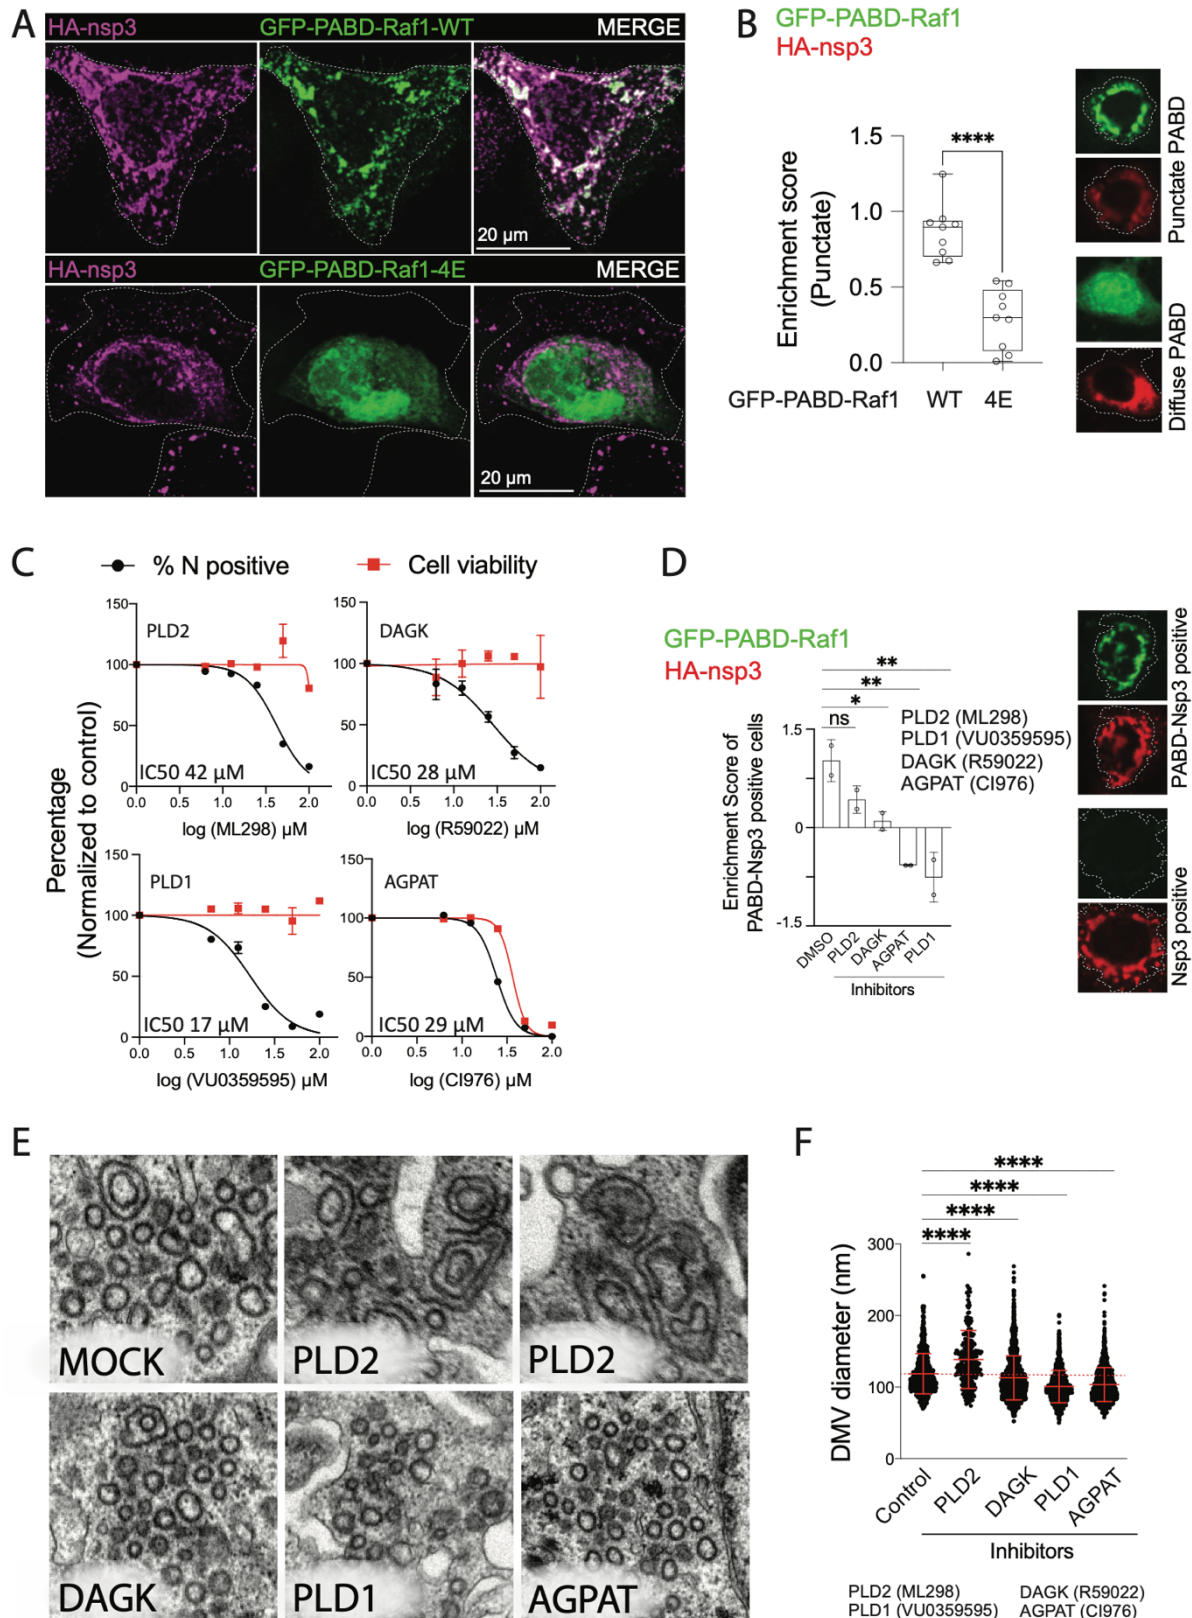

673  
674  
675  
676  
677  
678

**Fig. 4. PA accumulation at SARS-CoV-2 DMVs and role of alternative PA synthesis pathways for SARS-CoV-2 replication and DMV formation.** (A) PA enrichment at SARS-CoV-2 nsp3-containing structures. Huh7-Lunet cells expressing the wildtype or mutant form of the PA sensor were transfected with the plasmid encoding HA-nsp3-4-V5 and

679 24 h later, cells were fixed, immunostained with HA-specific antibody and HA-nsp3 and  
680 GFP-PABD were visualized by confocal microscopy. Maximum intensity projections are  
681 shown. **(B)** Using CellProfiler Analyst, a semi-supervised machine learning classifier was  
682 trained to differentiate between punctate and diffuse signals of the GFP-PABD sensor (top  
683 panel). A normalized enrichment score which indicates the probability of cells showing  
684 punctate GFP-PABD localization to nsp3 fluorescent signal across the whole cell population  
685 is shown in the graph on the bottom panel. Significance was calculated by unpaired t-test.  
686 \*\*\*\*,  $p < 0.0001$ . **(C)** Alternative pathways for PA generation are important for SARS-CoV-2  
687 replication. Calu-3 cells were infected with SARS-CoV-2 (MOI=5) in the presence of  
688 AGPAT, PLD1/2, or DAGK inhibitors. Cells were fixed 24 h post infection, stained with  
689 nucleocapsid-specific antibody and percentage of infected cells was quantified using  
690 CellProfiler. Cell viability and percentage inhibition are plotted as dose-response curves and  
691 IC50 values are given on the top of each panel. **(D)** AGPAT, PLD and DAGK inhibitors  
692 reduce PA accumulation at nsp3-positive structures. Huh7-Lunet cells were transfected with  
693 SARS-CoV-2 HA-nsp3-4-V5 and GFP-PABD-Raf1 encoding plasmids, followed by addition  
694 of a given inhibitor 4h after transfection. Twenty-four hours later, cells were fixed and HA-  
695 nsp3 was detected with an HA-specific antibody. GFP-PABD and HA-nsp3 were visualized  
696 by confocal microscopy. A semi-automated machine learning based classifier was trained to  
697 separate HA-nsp3/PABD double-positive structures from HA-nsp3 single positive structures.  
698 Enrichment score for HA-nsp3/PABD double-positive structures showing the up or  
699 downregulation of double positive cells in different samples is plotted and statistical  
700 significance was calculated using ordinary one-way ANOVA. \*,  $p < 0.05$ , \*\*,  $p < 0.005$ . **(E)**  
701 Decrease of SARS-CoV-2 DMV diameter by AGPAT, PLD and DAGK inhibitors. Huh7-  
702 Lunet/T7 cells were transfected with the plasmid encoding HA-nsp3-4-V5 and fluorescent  
703 NeonGreen, followed by addition of inhibitors 4 h after transfection. Twenty-four hours later,  
704 cells were fixed, NeonGreen positive cells were recorded and examined by EM.  
705 Representative images are shown for each condition. **(F)** Number and morphology of DMVs  
706 were determined for at least 7 cell profiles per condition. DMV diameters are plotted and  
707 statistical significance was calculated using ordinary one-way ANOVA. \*\*\*\*,  $p < 0.001$ .
